# Supplementary material for: New Meroterpenoids from the Endophytic Fungus Aspergillus flavipes AIL8 Derived from the Mangrove Plant Acanthus ilicifolius
Source: MDPI journal article supplement (doi:10.3390/md13010237), 2015-01-07
Supplement: s1 [file s1]

# Supplementary Information

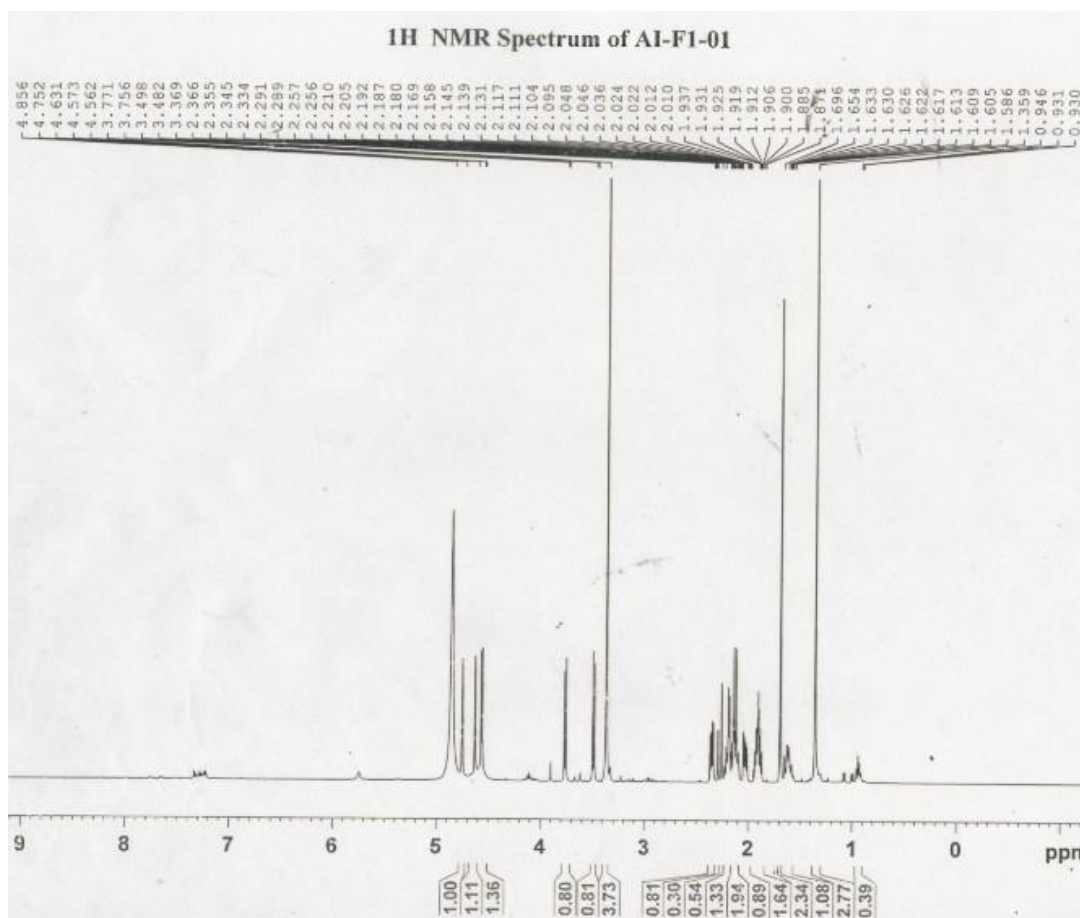

**Figure S1.** <sup>1</sup>H NMR of Compound **1**.

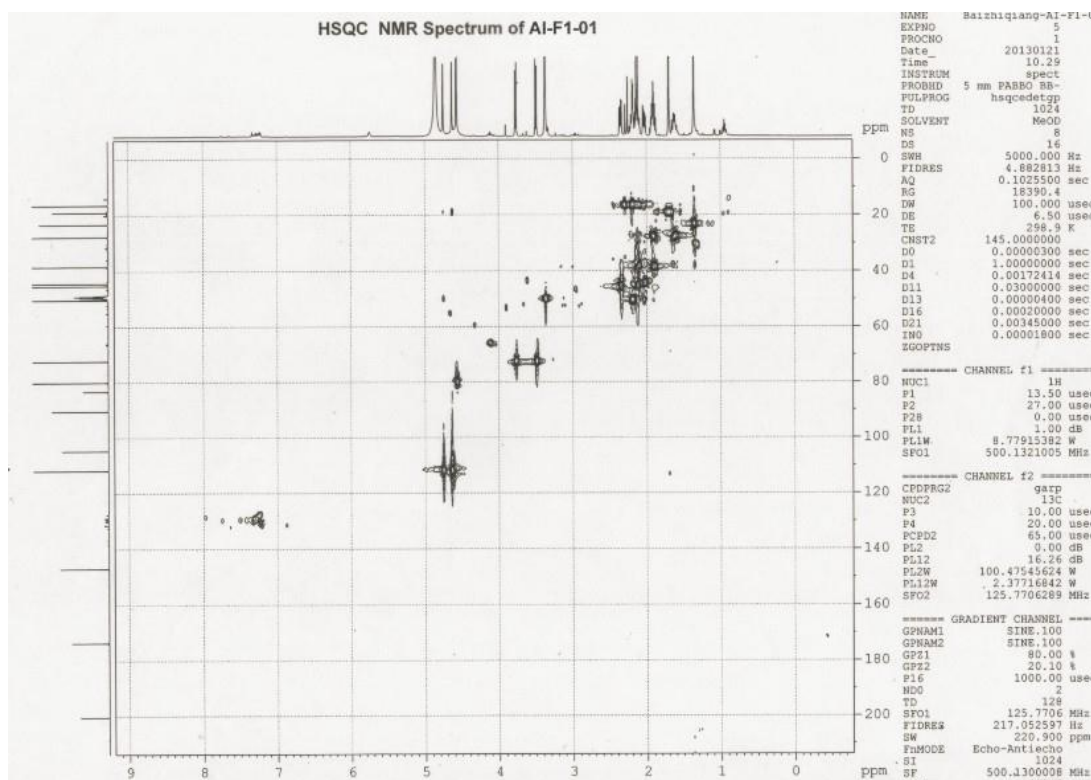

**Figure S2.** HSQC NMR of Compound **1**.

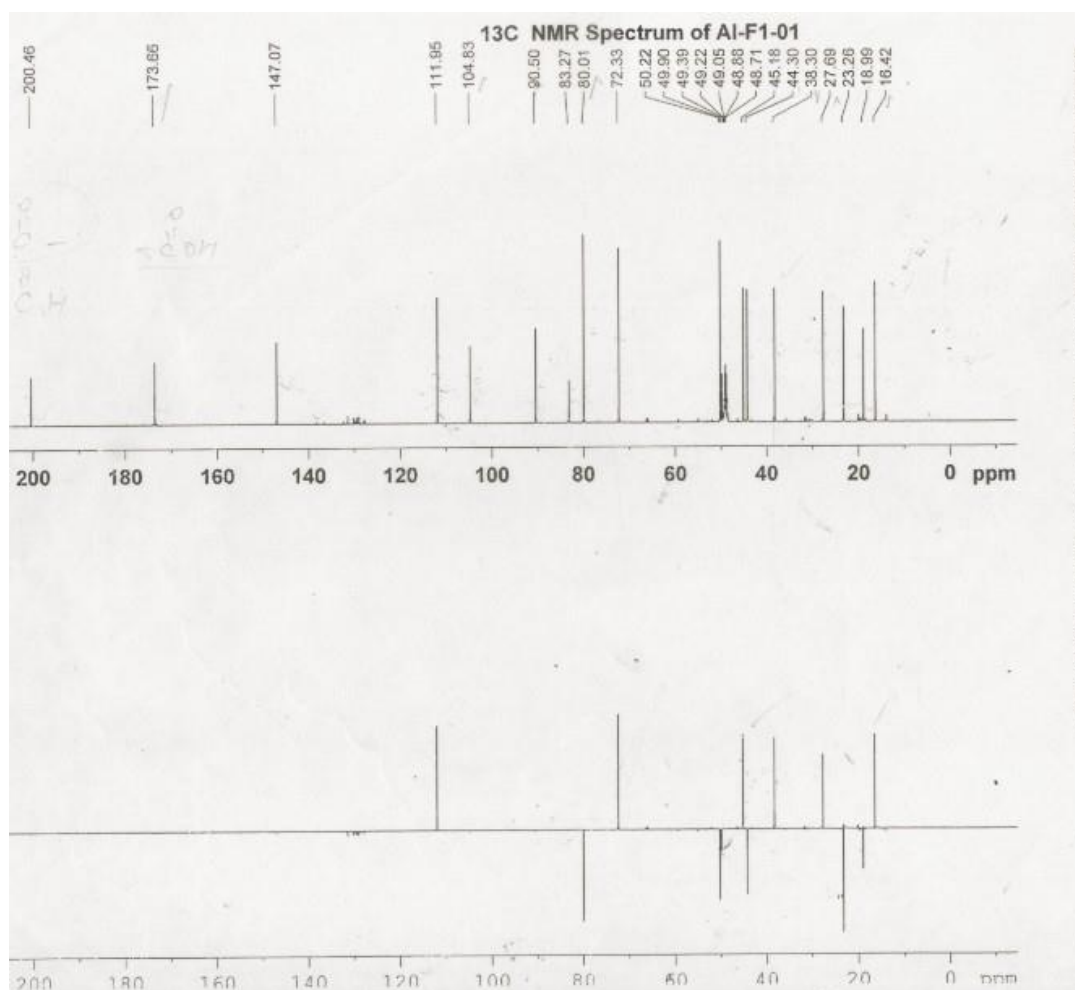Figure S3.  $^{13}\text{C}$  and DEPT (135  $^\circ$ ) NMR of Compound 1.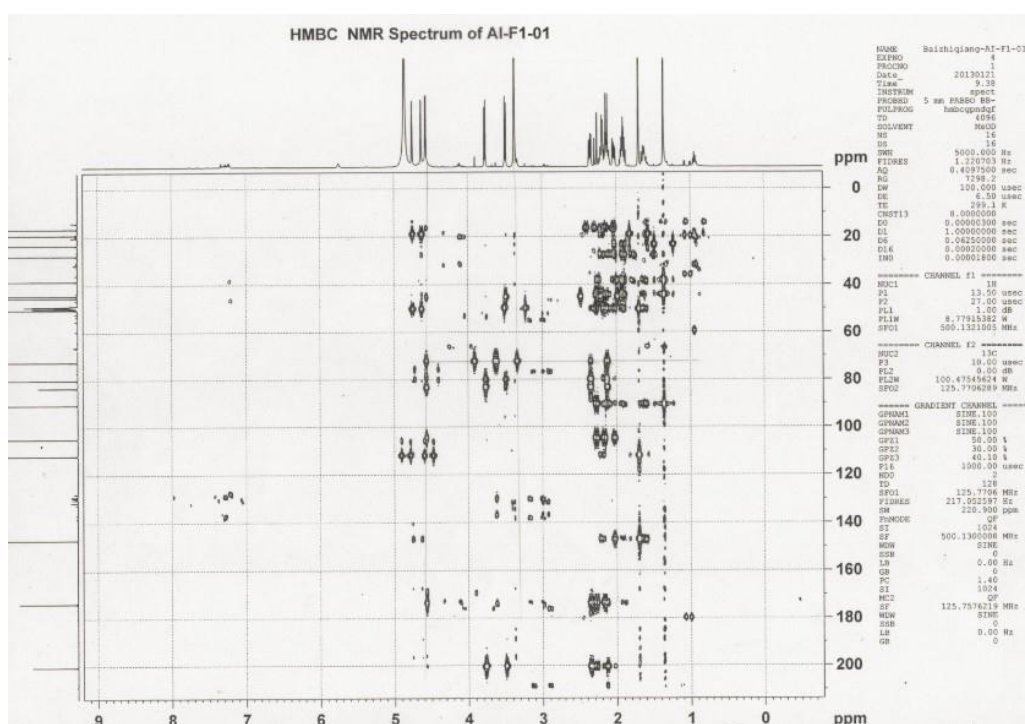

Figure S4. HMBC NMR of Compound 1.

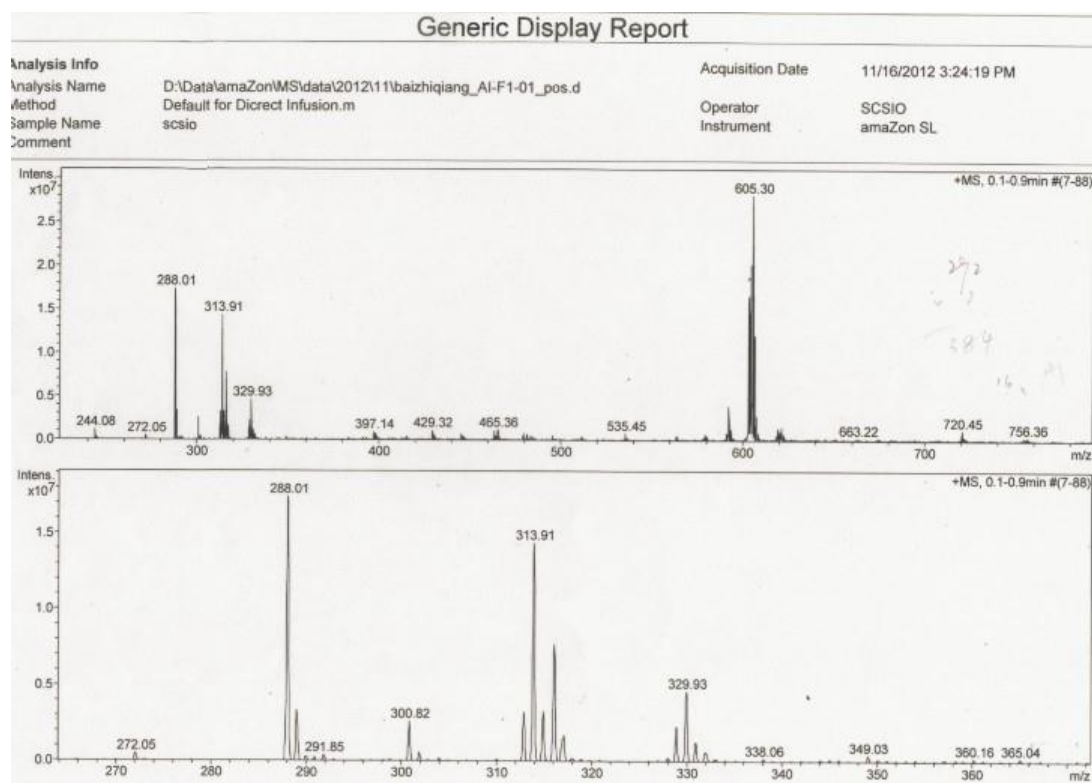**Figure S5.** ESI-MS of Compound 1.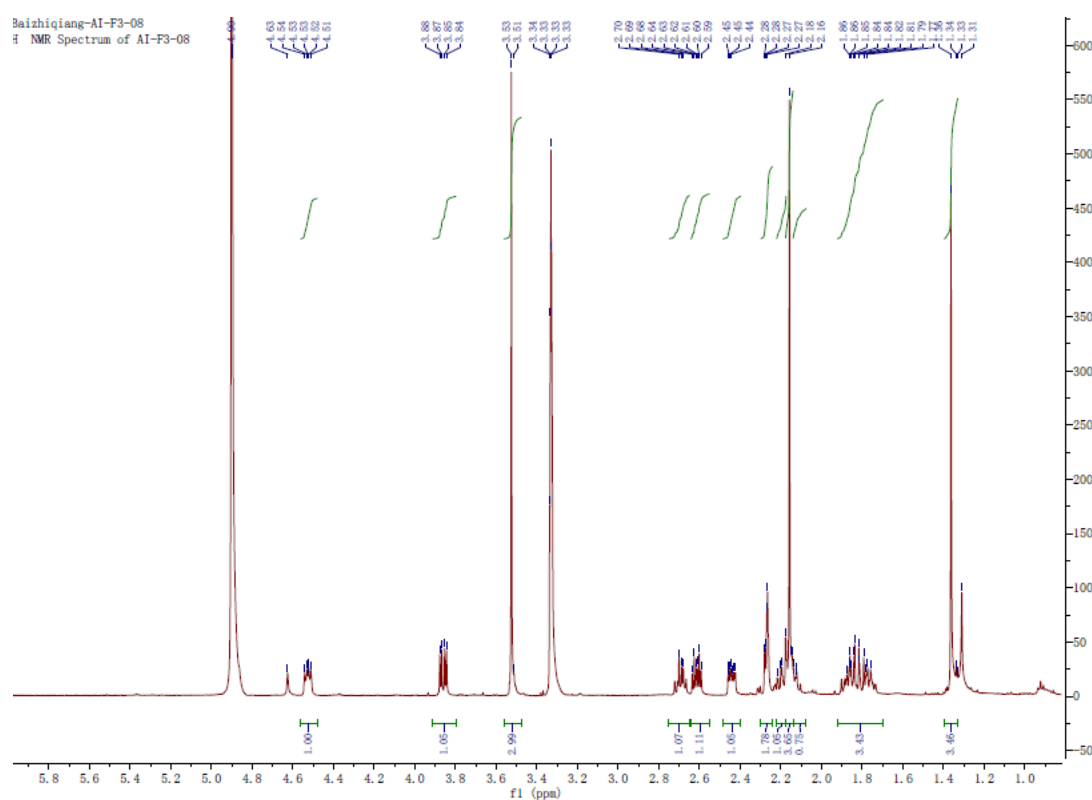**Figure S6.**  $^1\text{H}$  NMR of Compound 2.

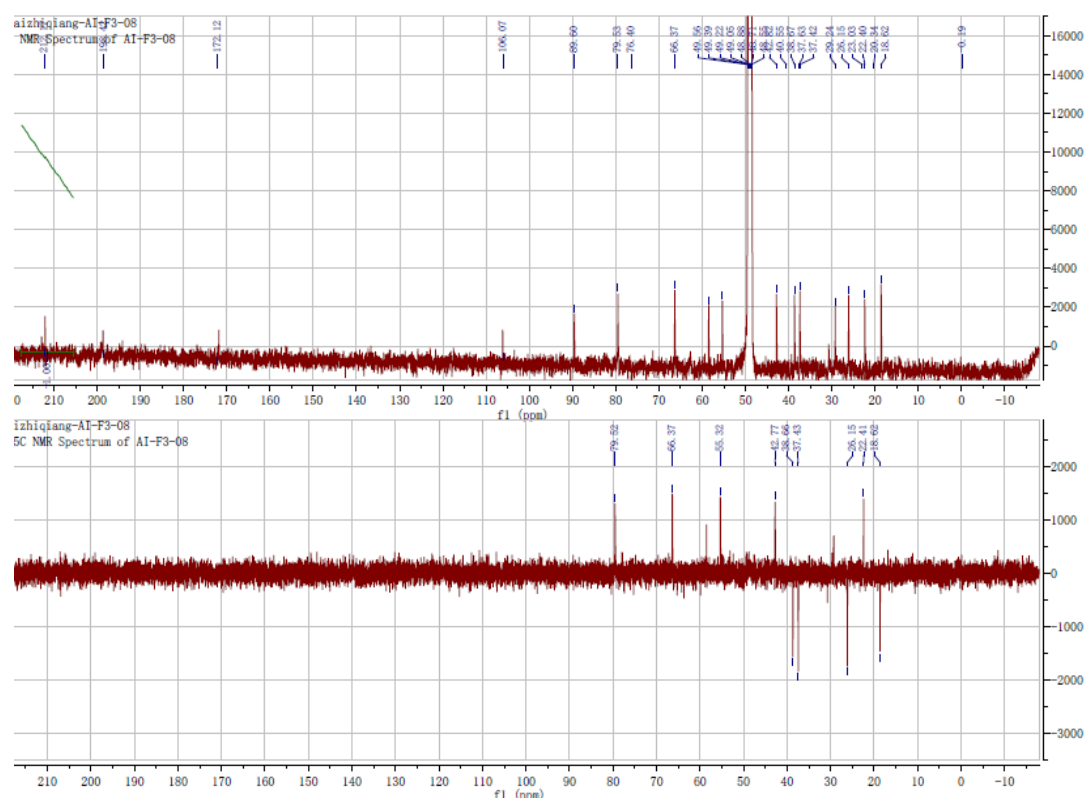

**Figure S7.**  $^{13}\text{C}$  and DEPT (135 °) NMR of Compound 2.

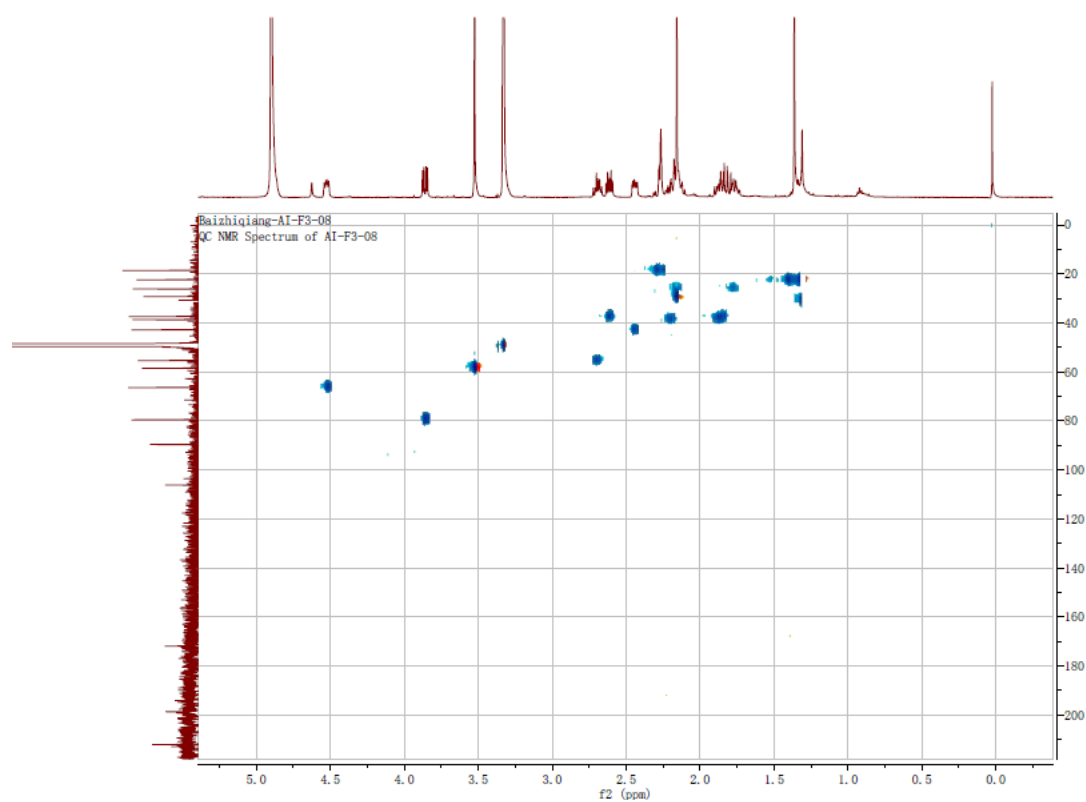

**Figure S8.** HMQC NMR of Compound 2.

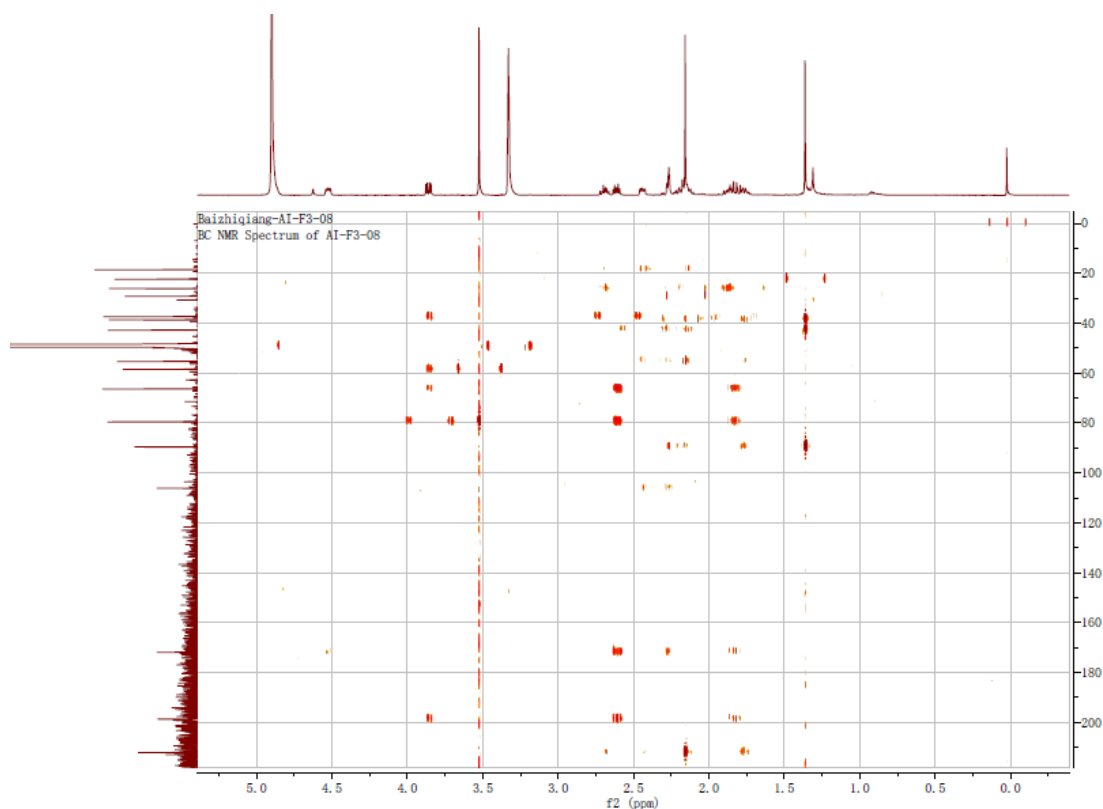

Figure S9. HMBC NMR of Compound 2.

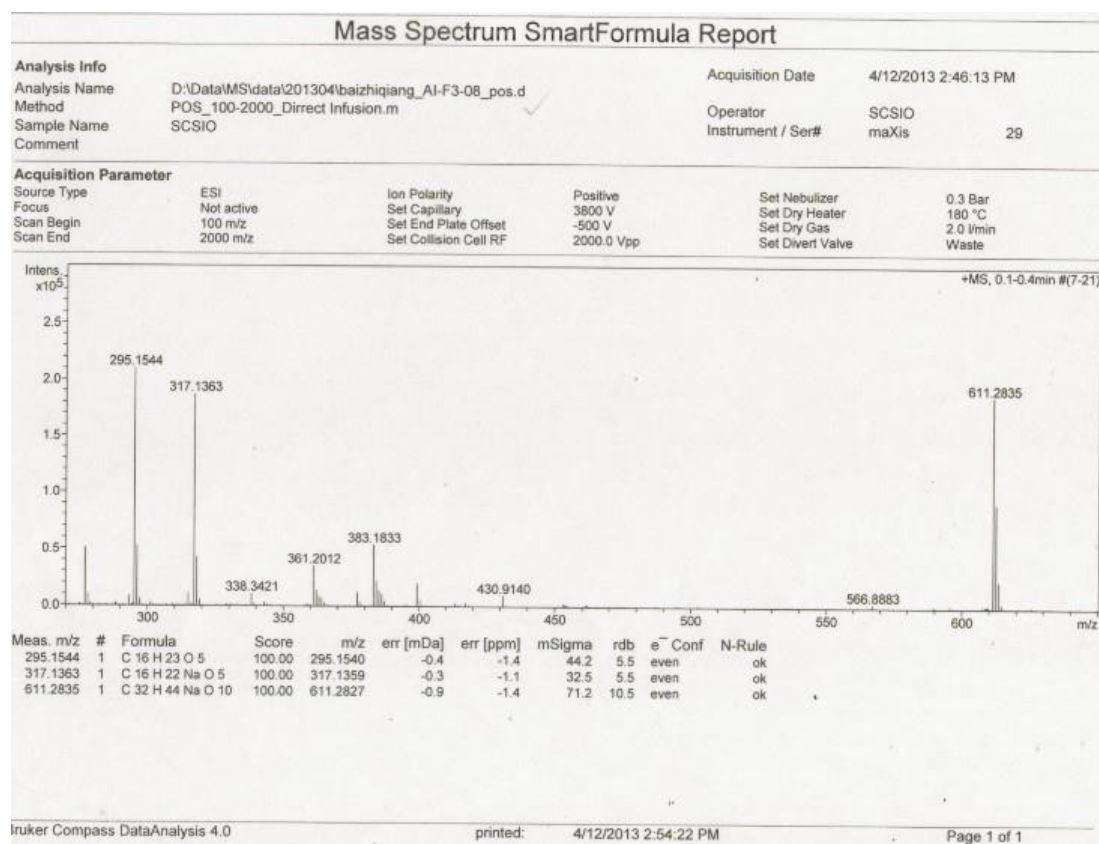

Figure S10. HR-ESI-MS of Compound 2.

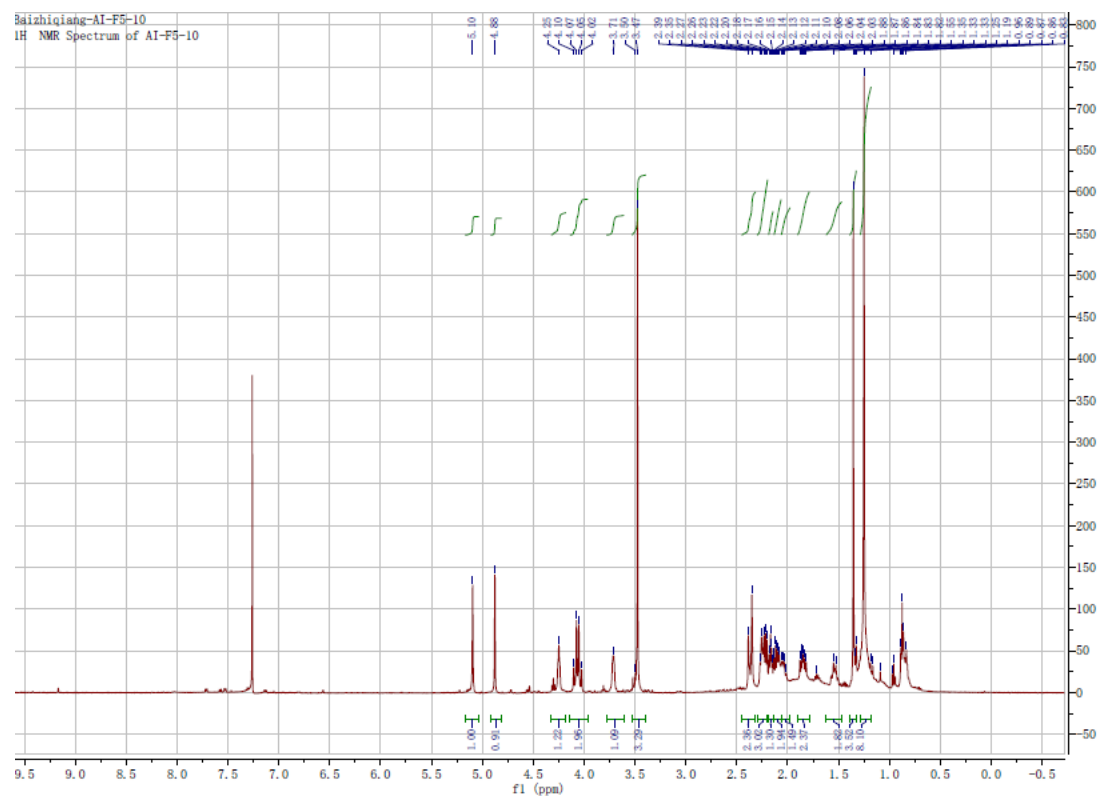**Figure S11.** <sup>1</sup>H NMR of Compound 3.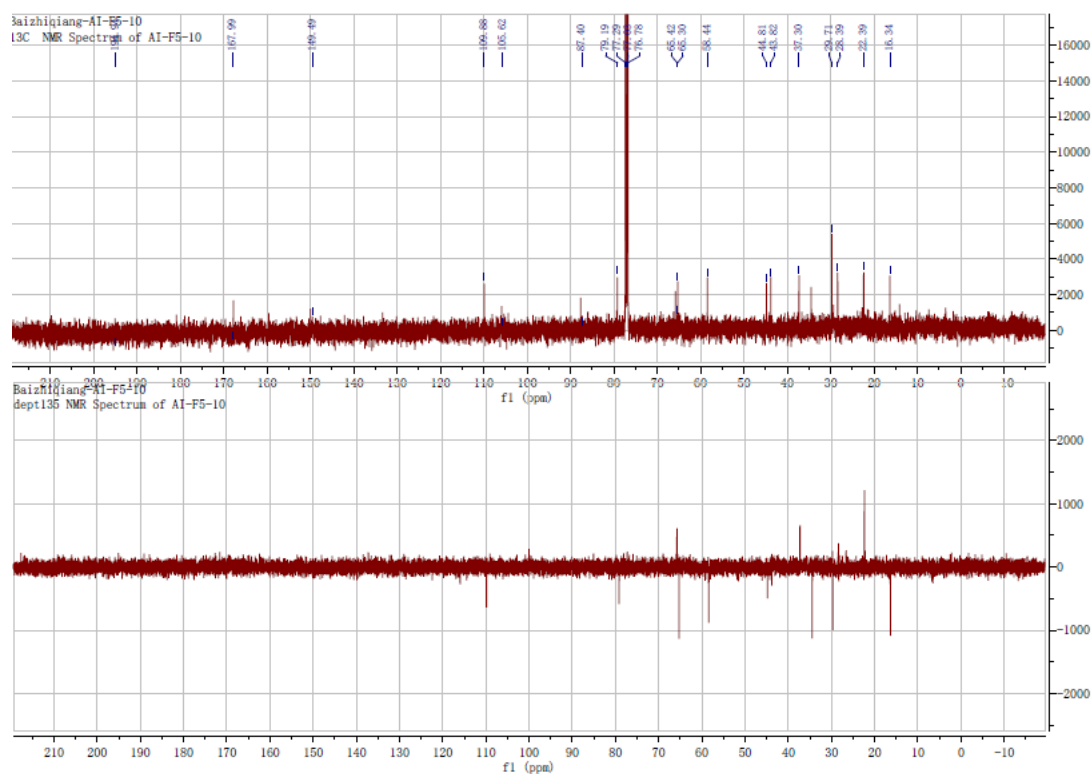**Figure S12.** <sup>13</sup>C and DEPT (135 °) NMR of Compound 3.



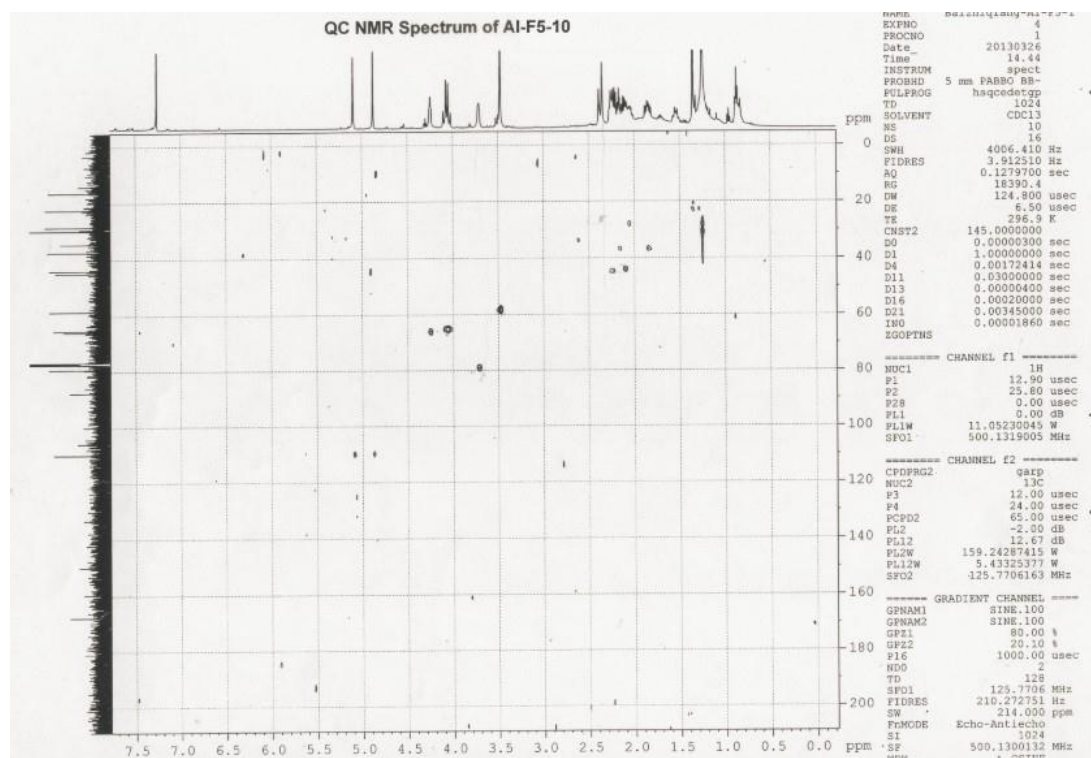

Figure S13. HMQC NMR of Compound 3.

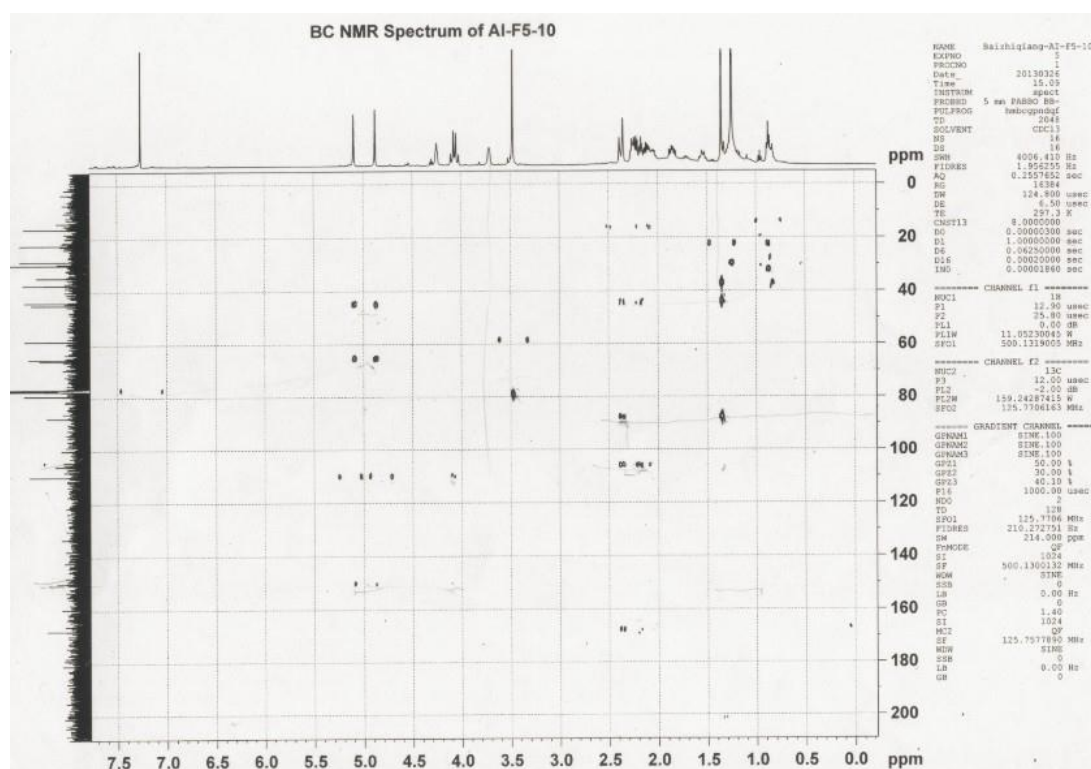

Figure S14. HMBC NMR of Compound 3.

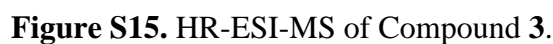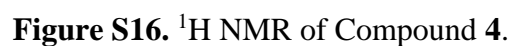



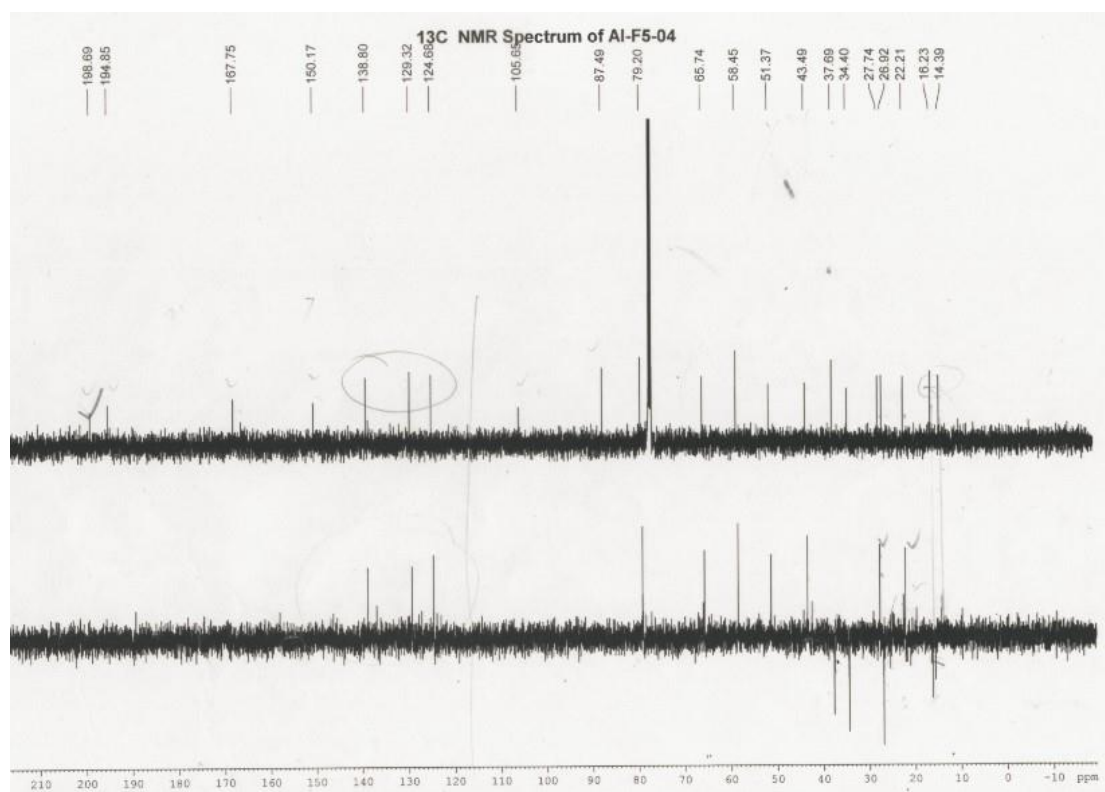Figure S17. <sup>13</sup>C 和DEPT (135 °) NMR of Compound 4.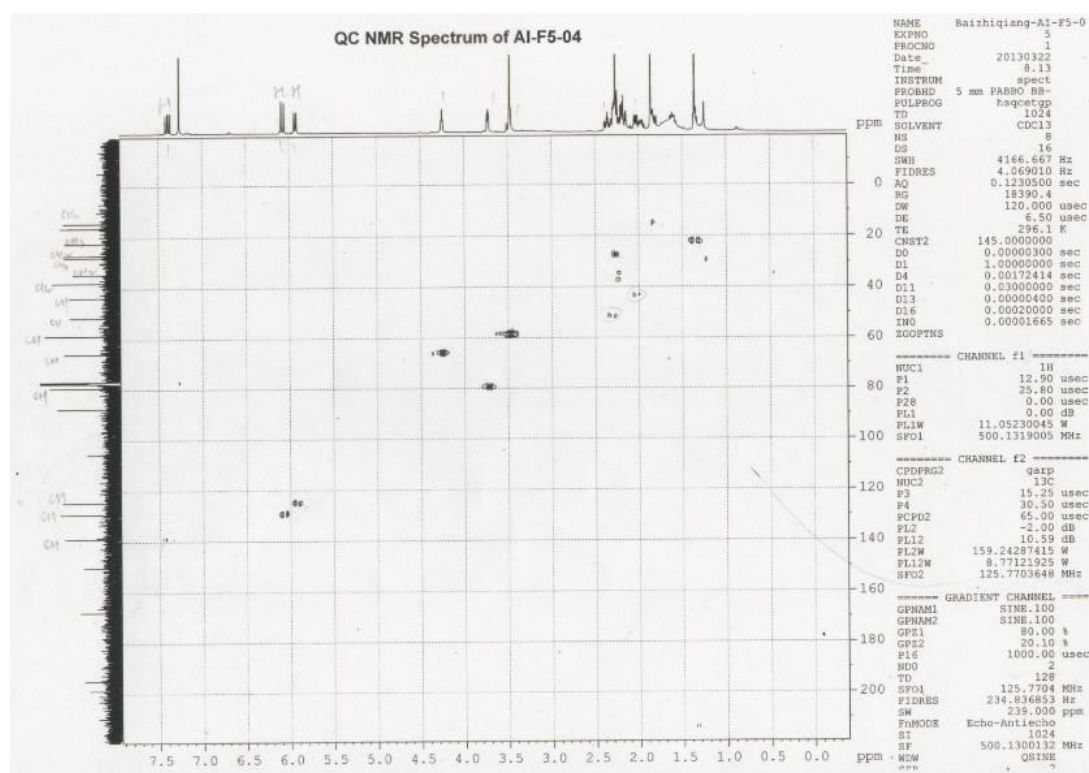

Figure S18. HMQC NMR of Compound 4.

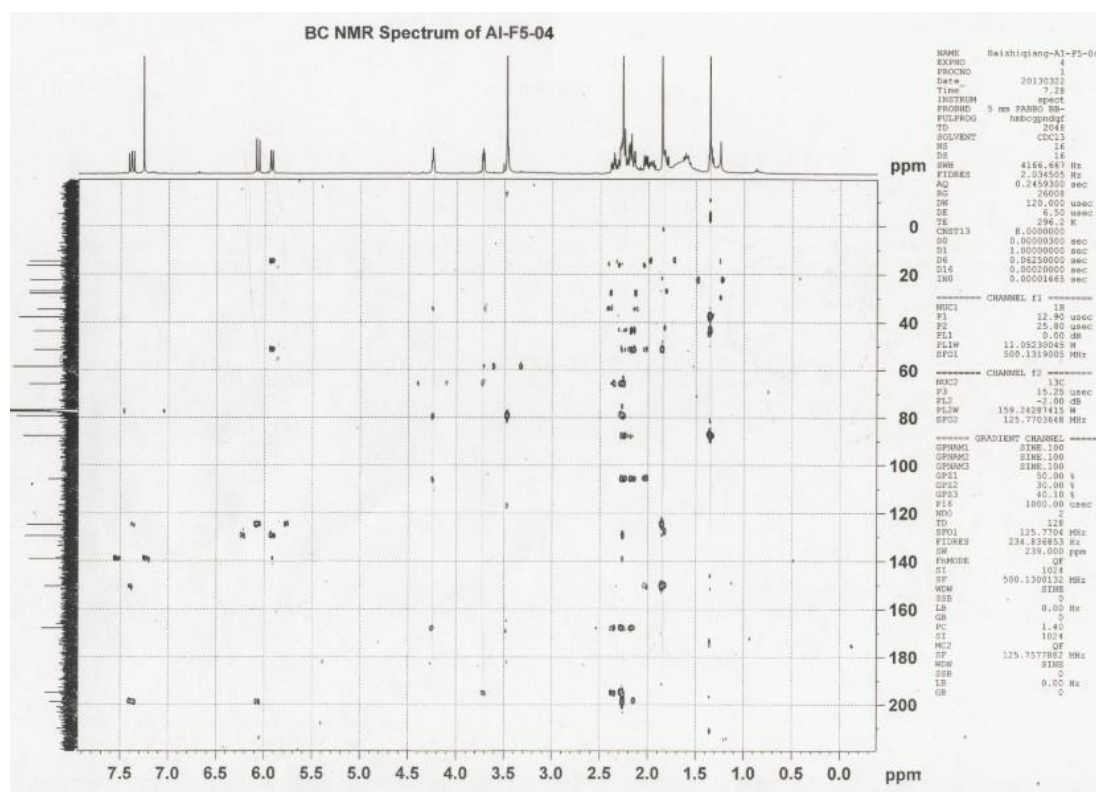

Figure S19. HMBC NMR of Compound 4.

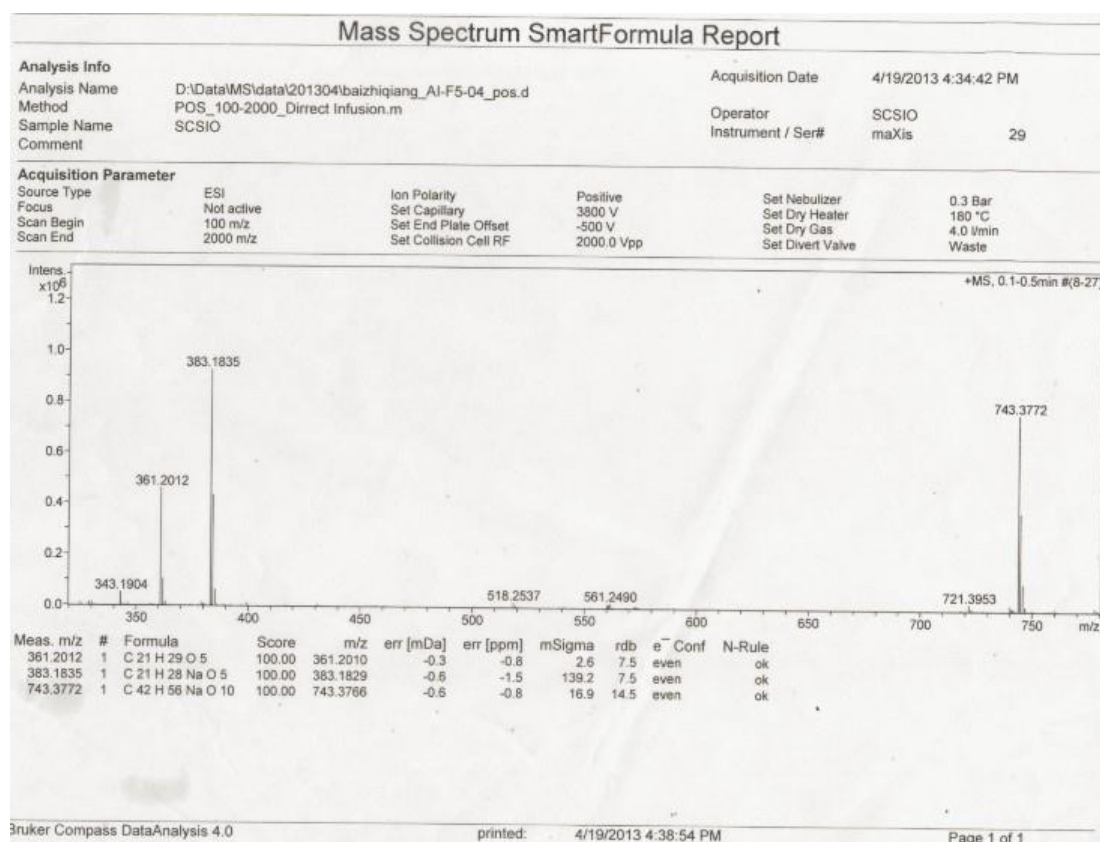

Figure S20. HR-ESI-MS of Compound 4.

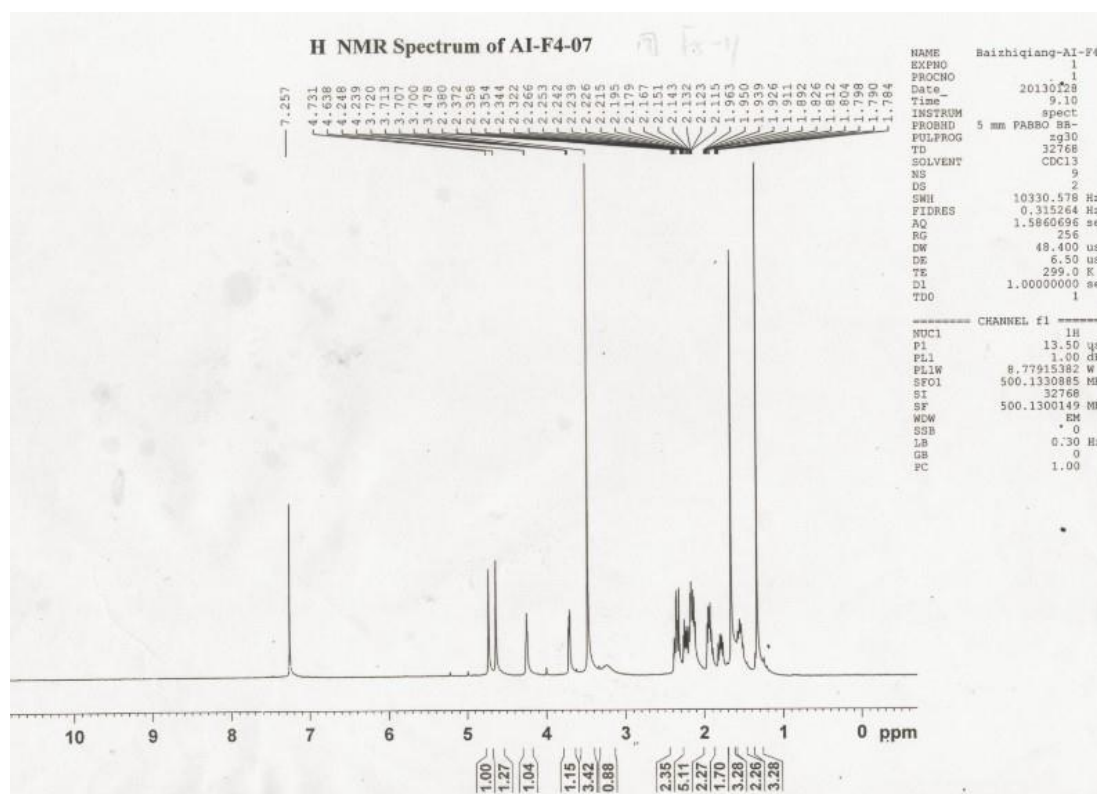Figure S21. <sup>1</sup>H NMR of Compound 5.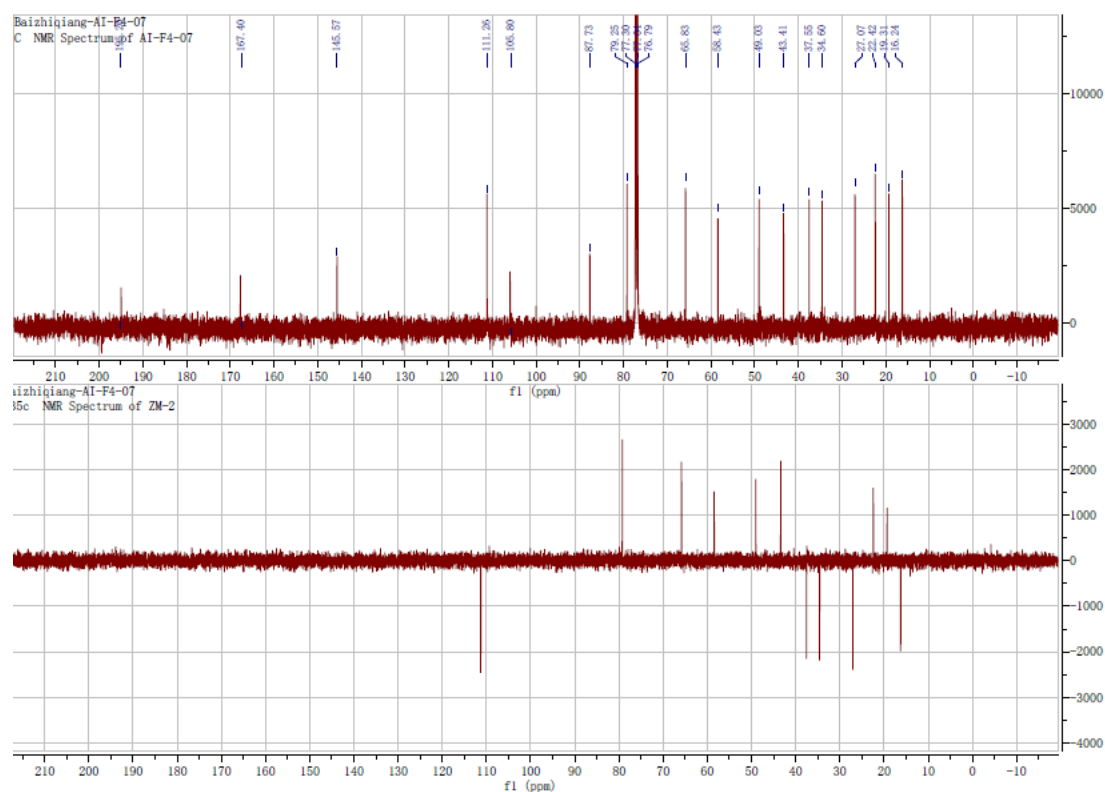Figure S22. <sup>13</sup>C and DEPT (135 °) NMR Compound 5.

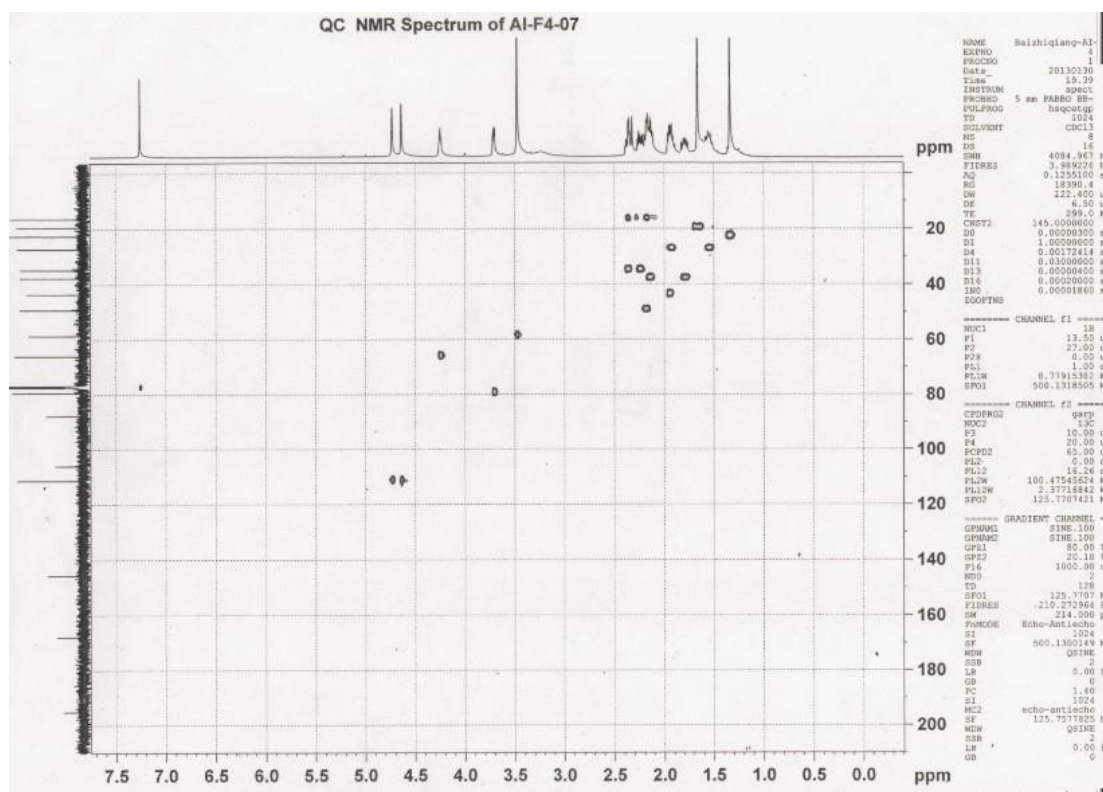

Figure S23. HMQC of Compound 5.

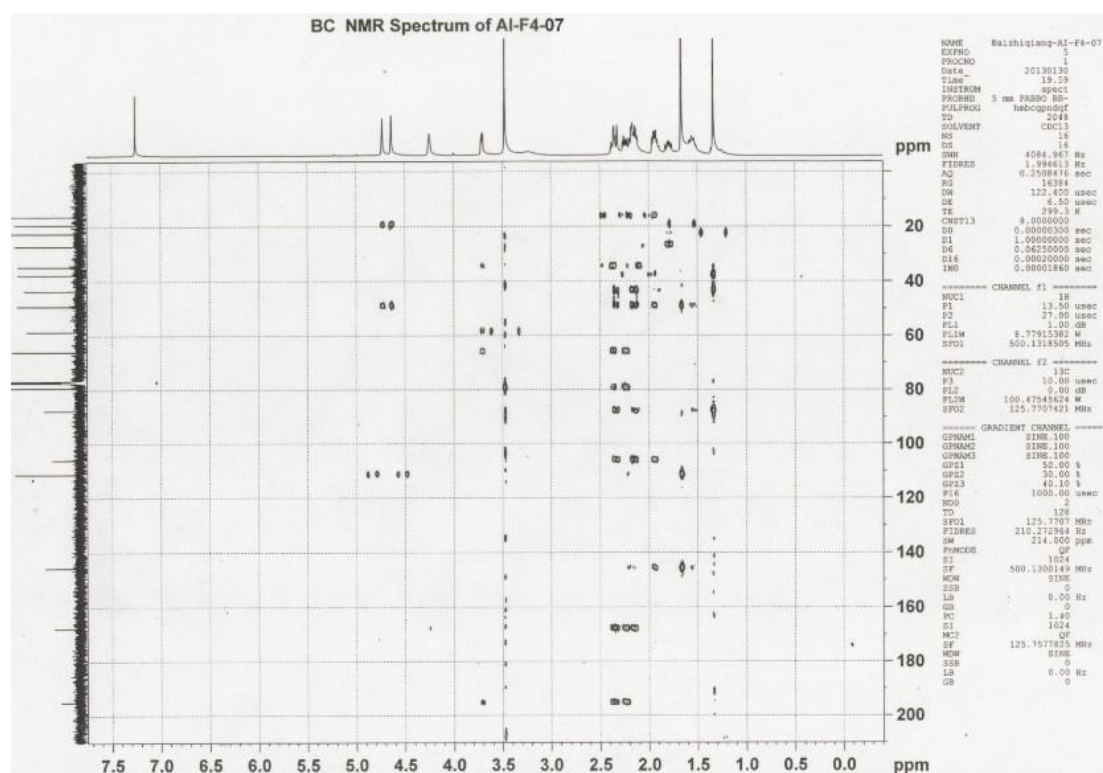

Figure S24. HMBC of Compound 5.



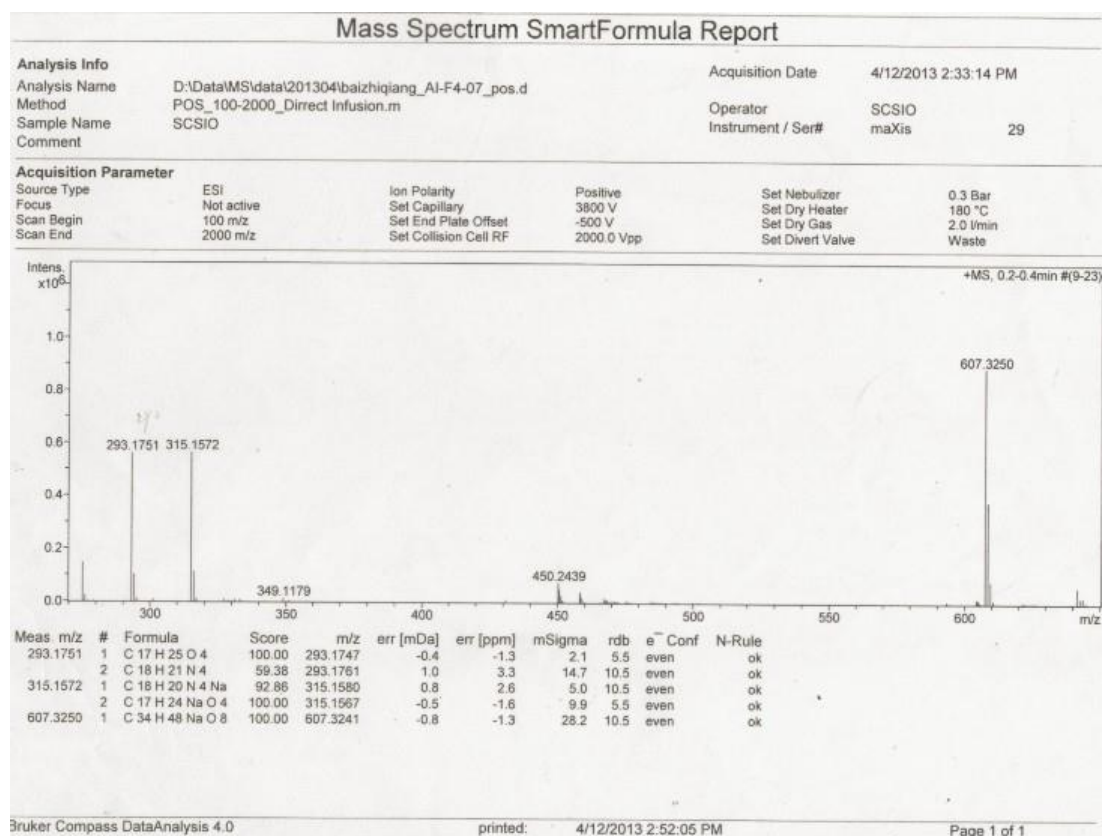

Figure S25. HR-ESI-MS of Compound 5.

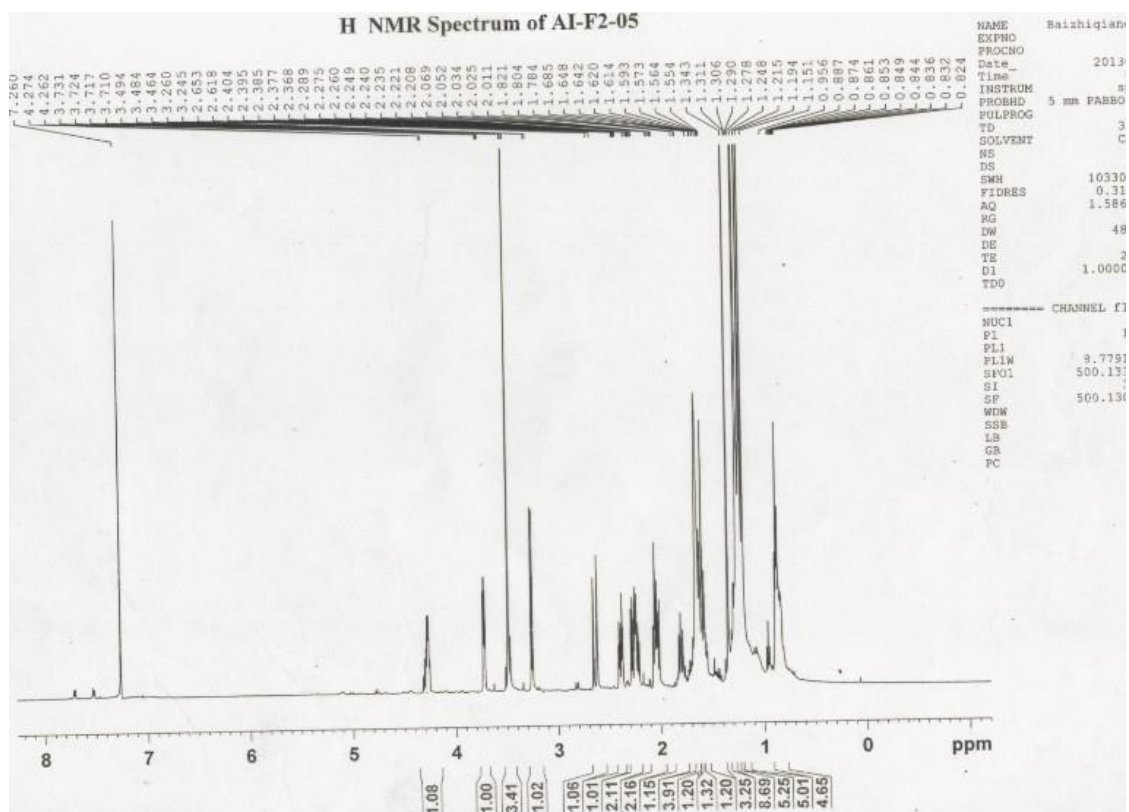Figure S26. <sup>1</sup>H NMR of Compound 6.

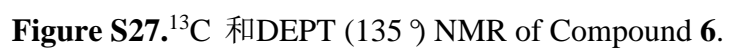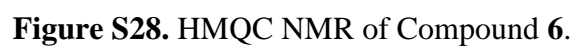



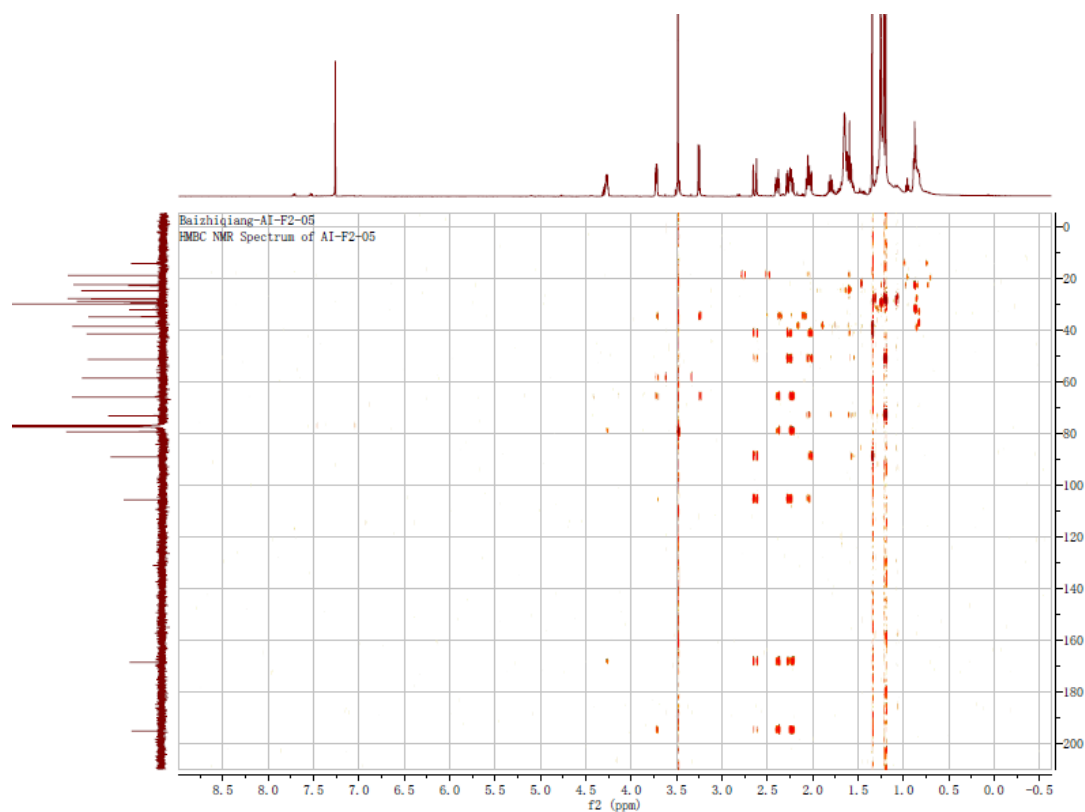

Figure S29. HMBC NMR of Compound 6.

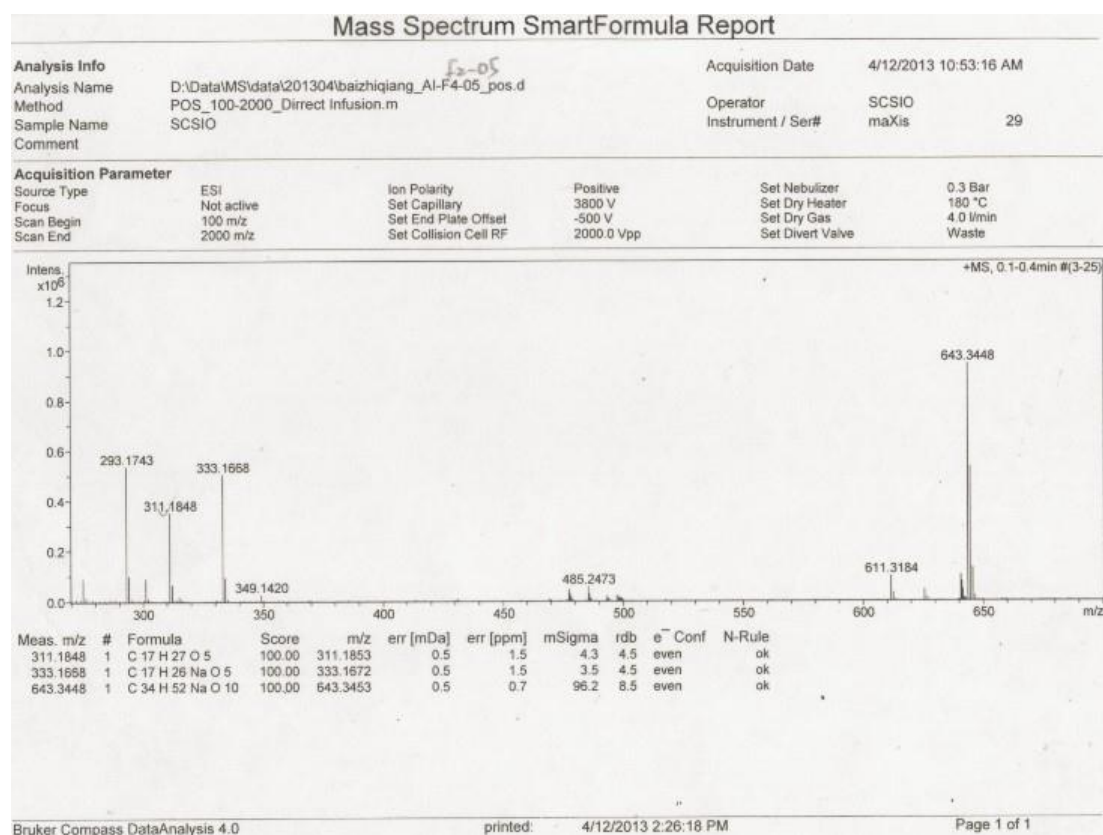

Figure S30. HR-ESI-MS of Compound 6.

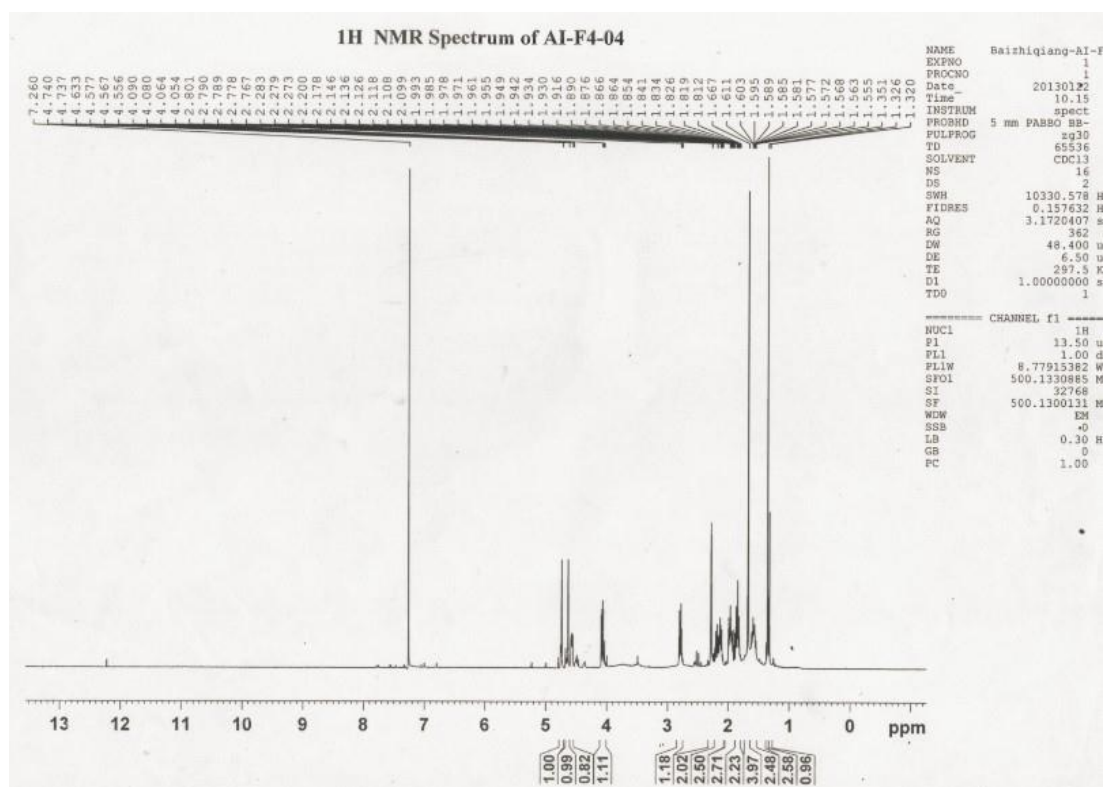Figure S31. <sup>1</sup>H NMR of Compound 7.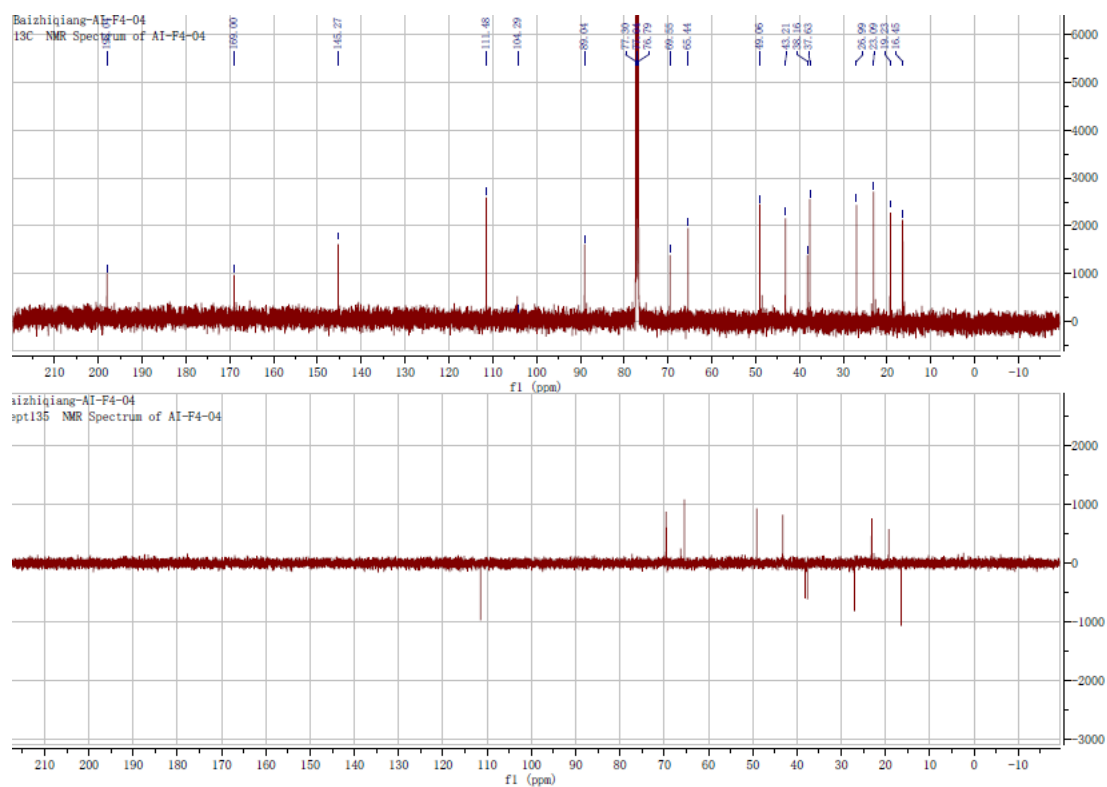Figure S32. <sup>13</sup>C and DEPT (135 °) NMR of Compound 7.

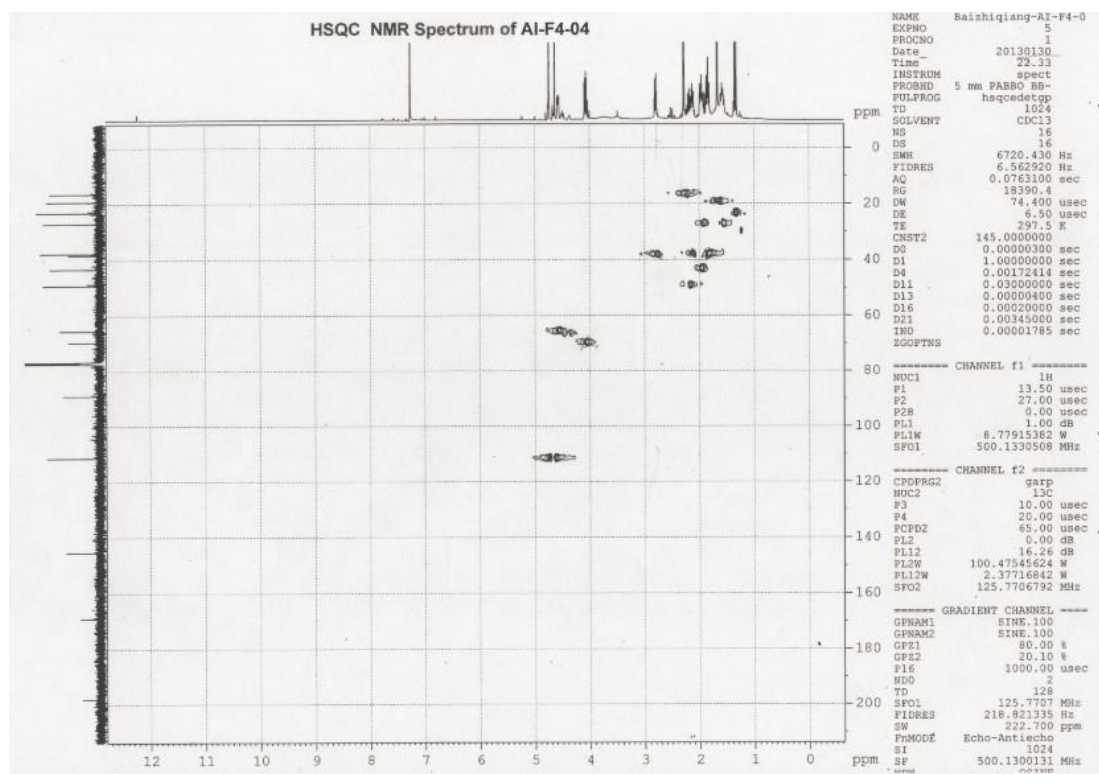

Figure S33. HMQC NMR of Compound 7.

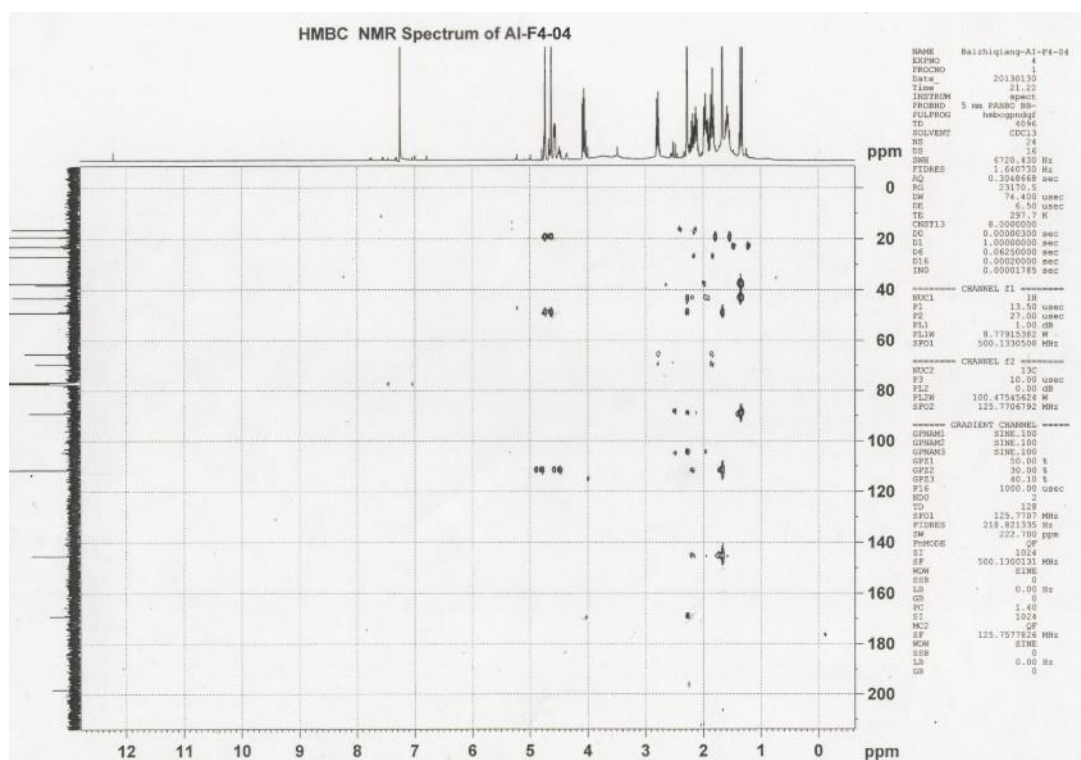

Figure S34. HMBC NMR of Compound 7.

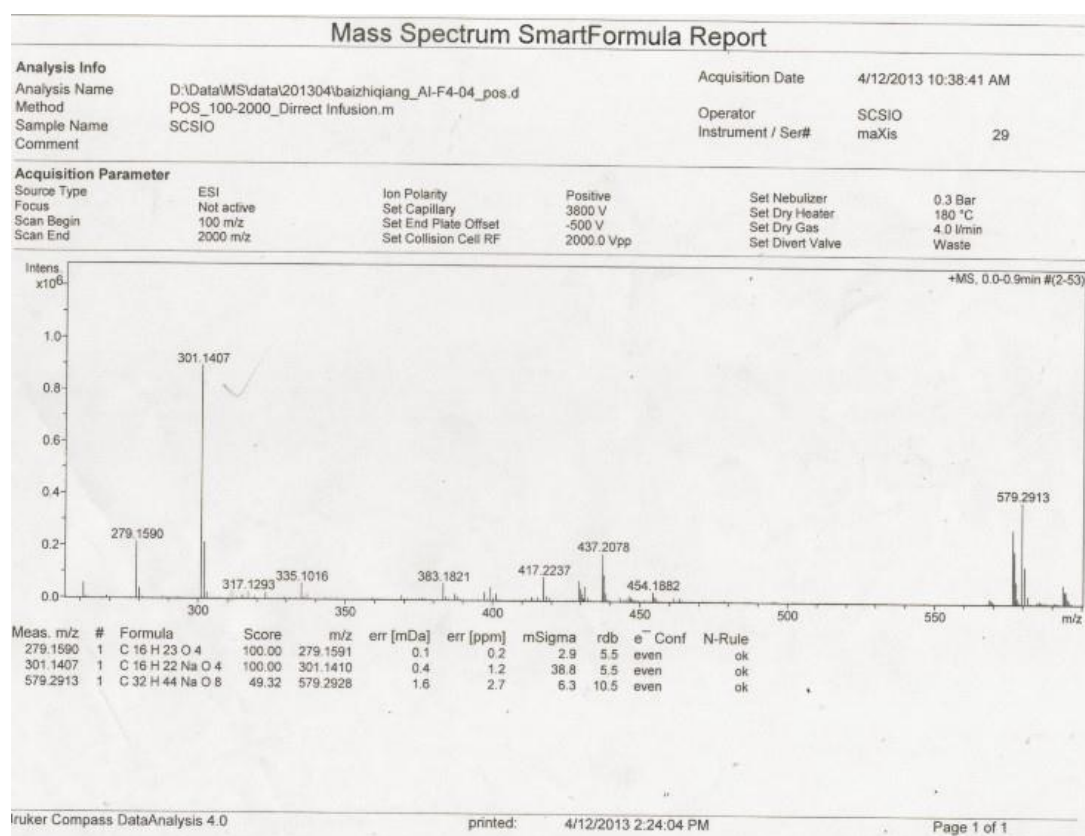

**Figure S35.** HR-ESI-MS of Compound 7.

© 2015 by the authors; licensee MDPI, Basel, Switzerland. This article is an open access article distributed under the terms and conditions of the Creative Commons Attribution license (<http://creativecommons.org/licenses/by/4.0/>).
